# Supplementary material
Source: ML conference proceedings conference paper supplement (https://openreview.net/forum?id=8SY8ete3zu)
Supplement: supplementary_material [file attachment]

## Requirements

1. Annotations should be fluent in English (better if they are English native speakers)
2. Three annotators for each case
3. Each case contains a sample text, and explanations from five models for the sample.
  - a. The order of models would be random.
4. We need to ask annotators to classify the sentiment of given sample text, and choose the best explanation.
  - . The detailed question would be:  
.What is the sentiment of the text?  
(Negative / Positive)
    - i.Please choose “all” good explanations which make sense to decide the sentiment of the given text.
    - ii.Which explanation is the best to your reasoning?  
(A / B / C / D / E)
    - iii.If you did not choose any explanation in question 2, please give your reasoning by selecting words from the sample text. (Maximum 4)

**<Description about task>**

The goal of this labeling task is to find the relevant explanations about the sentiment of the sample sentence from given choices. Occasionally, none of them would not be an appropriate explanation. In that case, please provide your reasoning by selecting words from the sample text. You will also choose the best explanation in your standard.

**<Labeling Examples>**

Here we show the sample text and explanation examples,

**<Example 1>**

| Text                                            | Explanation       |
|-------------------------------------------------|-------------------|
| The pasta was awesome, and the bread was tasty. | a. awesome, tasty |
|                                                 | b. tasty, was     |
|                                                 | c. the, was       |
|                                                 | d. and, bread     |
|                                                 | e. pasta, bread   |

There would be 1 text and 5 explanations for each case. You have to first choose if the text is positive or negative, and then choose the relevant explanations and the best explanation for the chosen sentiment. In this example, the right sentiment may be “positive” and the relevant explanation would be a and b. The best explanation would be a.
